# Supplementary material for: Designed single-phase ZrO2 nanocrystals obtained by solvothermal syntheses
Source: Royal Society of Chemistry journal article supplement (doi:10.1039/c9ce01992h), 2020-01-01
Supplement: c9ce01992h1.pdf [file c9ce01992h1.pdf]

## Electronic Supplementary Information

# Single-phase ZrO<sub>2</sub> nanocrystals obtained by solvothermal synthesis with different growth controlling-agents

*Mayara S. Santos, Jair C. C. Freitas, Cleocir J. Dalmaschio*

**Table S1.** Raman shift values observed for ZrO<sub>2</sub> samples synthesized in different solvents and different zirconium butoxide concentration.

| Raman shift (cm <sup>-1</sup> )        |                       |                      |  |
|----------------------------------------|-----------------------|----------------------|--|
| <b>[Zr(OBut)<sub>4</sub>] = 0.25 M</b> |                       |                      |  |
| <b>Solvent</b>                         |                       |                      |  |
| <b>oleic acid</b>                      | <b>benzyl alcohol</b> | <b>octyl alcohol</b> |  |
| 179                                    | 141                   | 146                  |  |
| 217                                    | 255                   | 179                  |  |
| 306                                    | 307                   | 217                  |  |
| 330                                    | 451                   | 269                  |  |
| 344                                    | 633                   | 316                  |  |
| 381                                    |                       | 330                  |  |
| 478                                    |                       | 381                  |  |
| 501                                    |                       | 474                  |  |
| 538                                    |                       | 501                  |  |
| 556                                    |                       | 538                  |  |
| 615                                    |                       | 556                  |  |
|                                        |                       | 615                  |  |
|                                        |                       | 638                  |  |
| <b>[Zr(OBut)<sub>4</sub>] = 0.5 M</b>  |                       |                      |  |
| <b>Solvent</b>                         |                       |                      |  |
| <b>oleic acid</b>                      | <b>benzyl alcohol</b> | <b>octyl alcohol</b> |  |
| 179                                    | 269                   | 146                  |  |
| 269                                    | 311                   | 269                  |  |
| 307                                    | 460                   | 311                  |  |
| 330                                    | 637                   | 460                  |  |
| 380                                    |                       | 602                  |  |
| 478                                    |                       | 642                  |  |
| 556                                    |                       |                      |  |
| 611                                    |                       |                      |  |

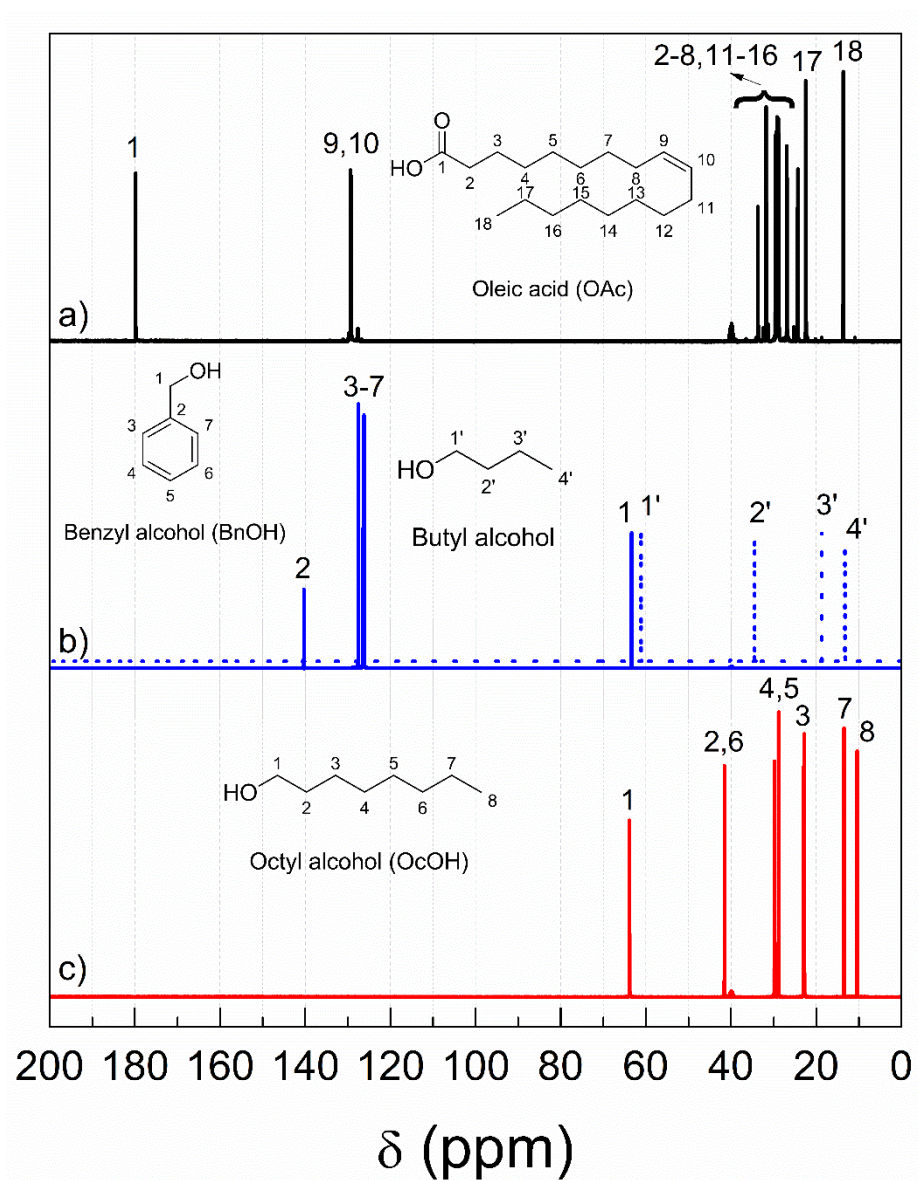

**Figure S1.** Solution  $^{13}\text{C}$  NMR spectra of the solvents used in the reaction systems: (a) oleic acid; (b) benzyl alcohol (solid line) and butyl alcohol (dashed line); (c) octyl alcohol.

**Table S2.** Spectral assignments of the signals detected in the solution  $^{13}\text{C}$  NMR spectra obtained for the solvents used in the syntheses.

| Oleic acid     |                 | Benzyl alcohol |        | Butyl alcohol  |        | Octyl Alcohol  |        |
|----------------|-----------------|----------------|--------|----------------|--------|----------------|--------|
| $\delta$ (ppm) | Carbon          | $\delta$ (ppm) | Carbon | $\delta$ (ppm) | Carbon | $\delta$ (ppm) | Carbon |
| 13.64          | C18             | 63.34          | C1     | 13.25          | C4'    | 10.40          | C8     |
| 22.45          | C17             | 125 –<br>129   | C3-7   | 18.71          | C3'    | 13.48          | C7     |
| 24 – 35        | C3              | 140.28         | C2     | 34.47          | C2'    | 22.77          | C6     |
| 28.7           | C2-8,<br>C11-16 |                |        | 161.13         | C1'    | 28.83          | C5     |
| 129.35         | C9, C10         |                |        |                |        | 29.81          | C4     |
| 179.8          | C1              |                |        |                |        | 41.53          | C2, C3 |
|                |                 |                |        |                |        | 63.82          | C1     |

**Table S3.** Spectral assignments of the signals detected in the  $^{13}\text{C}$  CP/MAS NMR spectra obtained for the  $\text{ZrO}_2$  NCs.

| $\text{ZrO}_2 - \text{OAc}$ |              | $\text{ZrO}_2 - \text{BnOH}$ |        | $\text{ZrO}_2 - \text{OcOH}$ |        |
|-----------------------------|--------------|------------------------------|--------|------------------------------|--------|
| $\delta$ (ppm)              | Carbon       | $\delta$ (ppm)               | Carbon | $\delta$ (ppm)               | Carbon |
| 14.79                       | C18          | 118.28 –<br>144.18           | C2-C7  | 17.08                        | C8     |
| 17.34 –<br>49.18            | C2-8, C11-17 | 173.48                       | dC     | 23.44                        | C7     |
| 131.14                      | C9, C10      | 13.40                        | C4'    | 27.27                        | C3     |
| 28.7                        | C8, C11      | 18.92                        | C3'    | 34.06                        | C4, C5 |
| 182.63                      | C1           | 38.88                        | C2'    | 43.83                        | C6     |
|                             |              | 183.25                       | dC'    | 53.59                        | C2     |
|                             |              |                              |        | 187.35                       | dC     |

#### Determination of number of ligand molecules per surface area on the nanocrystals

From the TGA curves (Figure 8), the DTG curves (Figure S2) were obtained, in order to evidence the mass losses. A mass loss was observed around 330 °C for the samples synthesized in benzyl alcohol and octyl alcohol, being associated to a butanoate type of ligand. The curves shown in Figure S2b and c were deconvoluted into two Gaussian components (Figure S3). The area of the Gaussian peak centered at 330 °C was taken as

the butanoate content and normalized with respect to the total organic mass loss (associated with the total area of the fitted DTG curves).

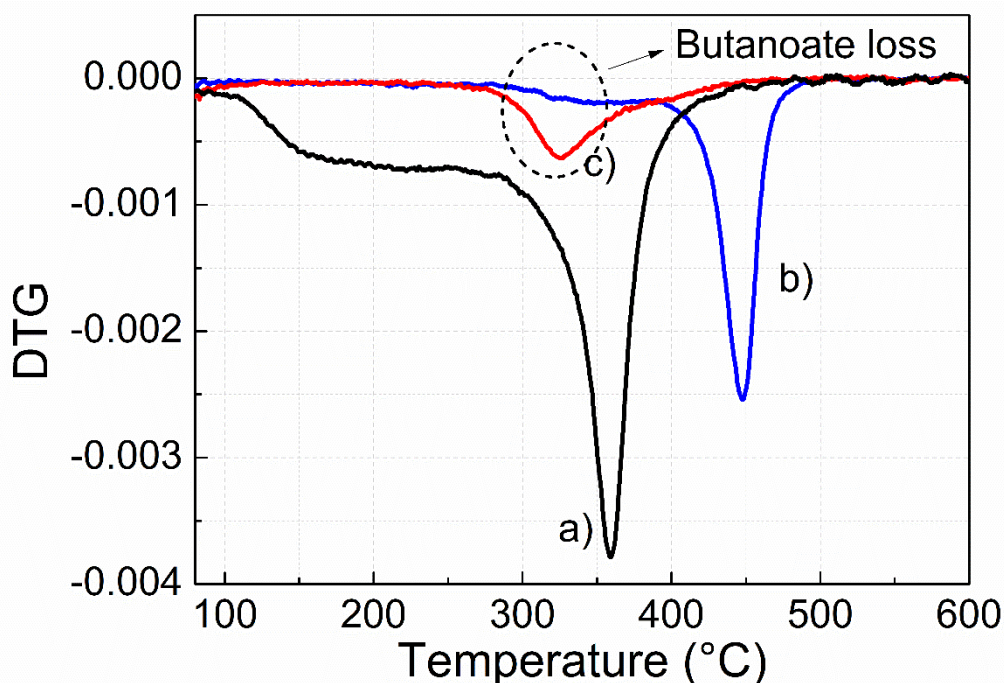

**Figure S2.** DTG curves obtained for the  $\text{ZrO}_2$  NCs synthesized in (a) oleic acid, (b) benzyl alcohol and (c) octyl alcohol.

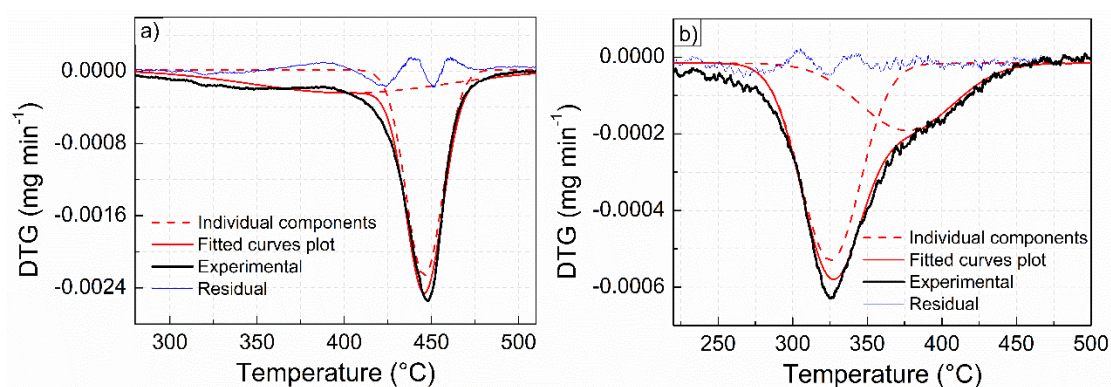

**Figure S3.** Deconvolution of DTG curves obtained for the  $\text{ZrO}_2$  NCs synthesized in (a) benzyl alcohol and (b) octyl alcohol.

With the DTG analysis, it was then possible to determine the mass contents of organic ligands from the TGA curves, as 36.4% (oleate); 12.6% (4.6% butanate and 8.0% benzoate) and 6.5% (4.2% butanoate and 2.3% octanoate) for the samples synthesized in

OAc, BnOH and OcOH, respectively. These results were correlated with the molecular mass of each organic ligand, giving the result in equation S1. The specific surface area was estimated from the average particle sizes obtained from the analysis of the TEM images, using either equation S2 (assuming nearly spherical particles for the samples synthesized in benzyl alcohol) or equation S3 (assuming cylindrical particles for the samples synthesized in oleic acid and octyl alcohol). Finally, combining equation S1 and equations S2 and S3, the number of ligand molecules per area unit on the surface of the nanocrystals can be estimated (equation S4).

$$\frac{N}{m_{ZrO_2}} = \frac{\left(\frac{\%m_{lig}}{\%m_{ZrO_2}}\right)}{MM_{lig}} \cdot N_A , \quad (S1)$$

where:

$N$  = number of ligand molecules;

$m_{ZrO_2}$  = mass of zirconia;

$\%m_{lig}$  = ligand mass content on the sample obtained by TGA experiments;

$\%m_{ZrO_2}$  = zirconia mass content on the sample obtained by TGA experiments;

$MM_{lig}$  = ligand molar mass;

$N_A$  = Avogadro number.

$$\frac{A_S}{m_{ZrO_2}} = \frac{4\pi r^2}{V_{ZrO_2} \cdot \rho_{ZrO_2}} = \frac{4\pi r^2}{\left(\frac{4}{3}\right)\pi r^3 \cdot \rho_{ZrO_2}} = \frac{3}{r \cdot \rho_{ZrO_2}} , \quad (S2)$$

$$\frac{A_S}{m_{ZrO_2}} = \frac{2\pi r(r+h)}{V_{ZrO_2} \cdot \rho_{ZrO_2}} = \frac{2\pi r(r+h)}{\pi r^2 h \cdot \rho_{ZrO_2}} = \frac{2(r+h)}{rh \cdot \rho_{ZrO_2}} , \quad (S3)$$

where:

$A_S$  = surface area;

$V$  = volume of the particles;

$r$  = average particle width obtained from TEM results;

$h$  = average particle length obtained from TEM results;

$\%m_{lig}$  = ligand mass content on the sample obtained by TGA experiments;

$\rho_{ZrO_2}$  = zirconia specific mass.

Taking the ratio from the results of equation S1 and S2 or S3:

$$\frac{N/m_{ZrO_2}}{A_S/m_{ZrO_2}} = \frac{N}{A_S} \quad (S4)$$
